# Supplementary material
Source: PubMed Central journal article supplement (PMC6379908)
Supplement: NIHMS984816-supplement-Online_Supplement.pdf [file NIHMS984816-supplement-Online_Supplement.pdf]

Supplemental online content for:

## Infusion-Compatible Antibiotic Formulations for Rapid Administration to Improve Outcomes in Outpatients With Cancer With Severe Sepsis and Septic Shock: The Sepsis STAT Pack

*Jason D. Goldman, MD, MPH; Amelia Gallaher, BS; Rupali Jain, PharmD; Zach Stednick, MPH; Manoj Menon, MD, MPH; Michael J. Boeckh, MD, PhD; Paul S. Pottinger, MD; Stephen M. Schwartz, PhD; and Corey Casper, MD, MPH*

J Natl Compr Canc Netw 2017;15(4):457–464

**eFigure 1:** APACHE II Score by Sepsis Severity for Sepsis STAT Pack Cohort

**eFigure 2:** Intravenous Fluids Administered in 6 and 24 Hours by Sepsis Severity for Sepsis STAT Pack Cohort

**eFigure 3:** Dosing, Timing of Infusion, Cost, and Infusion Compatibility Matrix of Potential Components of the Sepsis STAT Pack

**eTable 1:** Univariate Association of Selected Characteristics With Time-to-Antibiotics

**eTable 2:** Univariate Association of Selected Characteristics With Combined Outcome of SSh or 30-Day Cumulative Mortality

**eTable 3:** Processes of Care Delivery: Clinic Time Flow in Recipients of the Sepsis STAT Pack

**eTable 4:** Metrics of Sepsis Disease Severity for Sepsis STAT Pack Cohort

**eTable 5:** Clinically or Microbiologically Diagnosed Infections and Alternative Diagnoses

**eTable 6:** Unique Bacterial Bloodstream Isolates, Drug Susceptibility, and Intrinsic Resistance

**eTable 7:** Benchmark Mortality Data: Mortality Data for Patients With Cancer and Severe Sepsis/Septic Shock

**eAppendix 1:** Methods

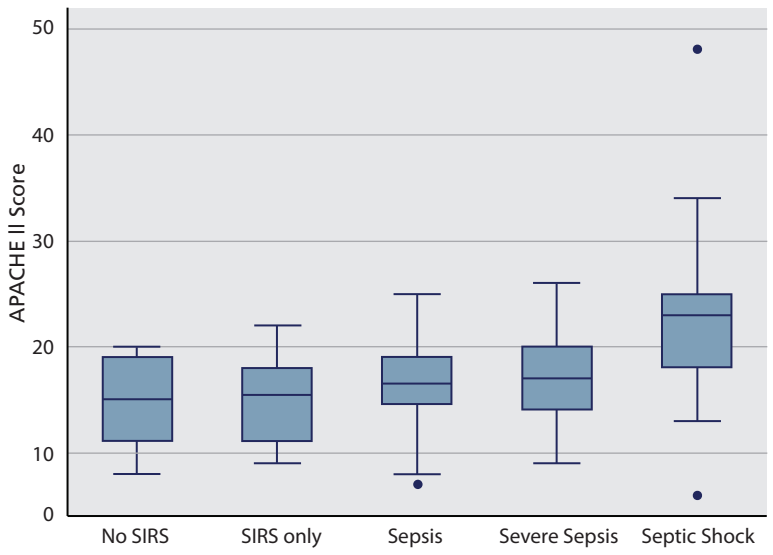

**eFigure 1.** APACHE II score by sepsis severity for Sepsis STAT Pack cohort. Abbreviation: SIRS, systemic inflammatory response syndrome.

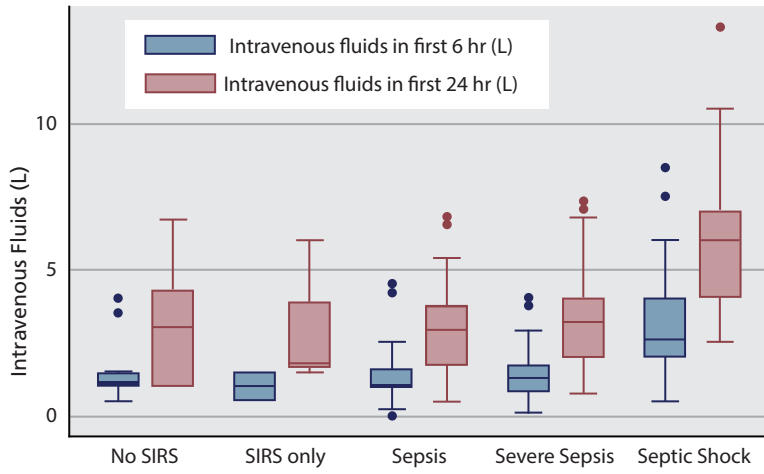

**Figure 2.** Intravenous fluids administered in 6 and 24 hours by sepsis severity for Sepsis STAT Pack cohort. Abbreviation: SIRS, systemic inflammatory response syndrome.

| STAT Pack   |                     |                  |                   | Minimum infusion time (min) | Dosing available | Weight-based dosing | Renal dose adjustment | Compatibility matrix:     |               |            |             |            |             |              |              |              |              |             |
|-------------|---------------------|------------------|-------------------|-----------------------------|------------------|---------------------|-----------------------|---------------------------|---------------|------------|-------------|------------|-------------|--------------|--------------|--------------|--------------|-------------|
| Antibiotic: | Dosing:             | Typical Dosing:  | Cost <sup>a</sup> |                             |                  |                     |                       | - Piperacillin/Tazobactam | - Ceftazidime | - Cefepime | - Aztreonam | - Imipenem | - Meropenem | - Gentamicin | - Tobramycin | - Vancomycin | - Daptomycin | - Linezolid |
| Pip/Tazo    | NA                  | 4.5 g IV q6hr    | \$23.39           | 30                          | Inf              | N                   | y                     | NA                        | NA            | NA         | NA          | NA         | NA          |              |              |              |              |             |
| Ceftazidime | NA                  | 2 g IV q8hr      | \$13.20           | 15                          | IVP              | N                   | y                     | NA                        | NA            | NA         | NA          | NA         | NA          |              |              |              |              |             |
| Cefepime    | NA                  | 2 g IV q8hr      | \$4.03            | 30                          | IVP              | N                   | y                     | NA                        | NA            | NA         | NA          | NA         | NA          |              |              |              |              |             |
| Aztreonam   | 2000 mg             | 2 g IV q8hr      | \$80.34           | 20                          | IVP              | N                   | y                     | NA                        | NA            | NA         | NA          | NA         | NA          |              |              |              |              |             |
| Imipenem    | 500 mg              | 500 mg IV q6hr   | \$14.17           | 20                          | Inf              | N                   | y                     | NA                        | NA            | NA         | NA          | NA         | NA          |              |              |              |              |             |
| Meropenem   | 1000 mg             | 1 g IV q8hr      | \$24.00           | 15                          | IVP              | N                   | y                     | NA                        | NA            | NA         | NA          | NA         | NA          |              |              |              |              |             |
| Gentamicin  | NA                  | 3-7 mg/kg/d      | \$6.50            | 30                          | Inf              | y                   | y                     | V                         | C             | C          | C           | C          | C           | NA           | NA           |              |              |             |
| Tobramycin  | 160 mg <sup>b</sup> | 3-7 mg/kg/d      | \$10.06           | 20                          | Inf              | y                   | y                     | I                         | C             | C          | C           | C          | NA          | NA           | NA           |              |              |             |
| Vancomycin  | NA                  | 15 mg/kg IV q12h | \$7.46            | 60                          | Inf              | y                   | y                     | V                         | V             | V          | V           | C          | C           | C            | NA           | NA           | NA           |             |
| Daptomycin  | NA                  | 6-8 mg/kg/d IV   | \$486.43          | 30                          | IVP              | y                   | y                     | C                         | C             | C          | C           | I          | C           | C            | C            | NA           | NA           | NA          |
| Linezolid   | 600 mg              | 600 mg IV q12hr  | \$147.97          | 30                          | Inf              | N                   | N                     | C                         | C             | C          | C           | C          | C           | C            | NA           | NA           | NA           |             |

  

|     |          |    |                        |
|-----|----------|----|------------------------|
| N   | No       | C  | Compatible             |
| y   | Yes      | V  | Variable compatibility |
| IVP | IV Push  | I  | Incompatible           |
| Inf | Infusion | NA | Not applicable         |

**Figure 3.** Dosing, timing of infusion, cost, and infusion compatibility matrix of potential components of the SSP. Abbreviations: IV, intravenously; NA, not applicable; Pip/Tazo, piperacillin/tazobactam; SSP, Sepsis STAT Pack <sup>a</sup>Cost: single dose by average wholesale price for 70 kg and 7 mg/kg/d when weight-based dose range is given. <sup>b</sup>Equivalent does for 80 kg person = 2 mg/kg.

| <b>eTable 1. Univariate Association of Selected Characteristics With Time-to-Antibiotics</b> |                                            |                                               |                              |                            |
|----------------------------------------------------------------------------------------------|--------------------------------------------|-----------------------------------------------|------------------------------|----------------------------|
| <b>Characteristic</b>                                                                        | <b>Time-to-ABx<br/>≤110 min<br/>(n=80)</b> | <b>Time-to-ABx<br/>&gt;110 min<br/>(n=80)</b> | <b>Total<br/>(Missing=2)</b> | <b>P Value<sup>a</sup></b> |
| <b>Demographics</b>                                                                          |                                            |                                               |                              |                            |
| Age, mean (SD), y                                                                            | 50.2 (15.6)                                | 51.8 (15.1)                                   | 51.0 (15.3)                  | .517                       |
| Sex                                                                                          |                                            |                                               |                              | .030                       |
| Female                                                                                       | 21 (38.2%)                                 | 34 (61.8%)                                    | 55 (34.4%)                   |                            |
| Male                                                                                         | 59 (56.2%)                                 | 46 (43.8%)                                    | 105 (65.6%)                  |                            |
| Race                                                                                         |                                            |                                               |                              | .160                       |
| Caucasian                                                                                    | 67 (53.6%)                                 | 58 (46.4%)                                    | 125 (82.8%)                  |                            |
| Other                                                                                        | 10 (38.5%)                                 | 16 (61.5%)                                    | 26 (17.2%)                   |                            |
| <b>Baseline clinical characteristics</b>                                                     |                                            |                                               |                              |                            |
| Oncologic diagnosis                                                                          |                                            |                                               |                              | .101                       |
| Heme malignancy                                                                              | 73 (52.5%)                                 | 66 (47.5%)                                    | 139 (86.9%)                  |                            |
| Other                                                                                        | 7 (33.3 %)                                 | 14 (66.7%)                                    | 21 (13.1%)                   |                            |
| HSCT status                                                                                  |                                            |                                               |                              | .752                       |
| Allo or auto                                                                                 | 37 (48.7%)                                 | 39 (51.3%)                                    | 76 (47.5%)                   |                            |
| None                                                                                         | 43 (51.2%)                                 | 41 (48.8%)                                    | 84 (52.5%)                   |                            |
| Immunosuppressives <sup>b</sup>                                                              |                                            |                                               |                              | .288                       |
| Any                                                                                          | 25 (56.8%)                                 | 19 (43.2%)                                    | 44 (27.5%)                   |                            |
| None                                                                                         | 55 (47.4%)                                 | 61 (52.6%)                                    | 116 (72.5%)                  |                            |
| Neutropenia                                                                                  |                                            |                                               |                              | .752                       |
| ANC <500 cells/mcL                                                                           | 39 (48.8%)                                 | 41 (51.3%)                                    | 80 (50.0%)                   |                            |
| ANC ≥500 cells/mcL                                                                           | 41 (51.3%)                                 | 39 (48.8%)                                    | 80 (50.0%)                   |                            |
| Antibiotics <sup>b</sup>                                                                     |                                            |                                               |                              | .316                       |
| Any                                                                                          | 56 (52.8%)                                 | 50 (47.2%)                                    | 106 (66.3%)                  |                            |
| None                                                                                         | 24 (44.4%)                                 | 30 (56.6%)                                    | 54 (33.8%)                   |                            |
| <b>Clinical characteristics/concurrent therapies (current sepsis episode)</b>                |                                            |                                               |                              |                            |
| Bacteremia                                                                                   |                                            |                                               |                              | .265                       |
| Yes                                                                                          | 39 (54.9%)                                 | 32 (45.1%)                                    | 71 (44.4%)                   |                            |
| No                                                                                           | 41 (46.1%)                                 | 48 (53.9%)                                    | 89 (55.6%)                   |                            |
| Dexamethasone                                                                                |                                            |                                               |                              | .081                       |
| Yes                                                                                          | 42 (57.5%)                                 | 31 (42.5%)                                    | 73 (45.6%)                   |                            |
| No                                                                                           | 38 (43.7%)                                 | 49 (56.3%)                                    | 87 (54.4%)                   |                            |

Time-to-antibiotics is given as time from first clinical encounter to administration of third Sepsis STAT Pack antibiotic, dichotomized at the median of 110 minutes.

Abbreviations: ABx, antibiotics; allo, allogeneic; ANC, absolute neutrophil count; auto, autologous; heme, hematopoietic; HSCT, hematopoietic stem cell transplant; SS, severe sepsis; SSh, septic shock.

<sup>a</sup>P value calculated using time-to-antibiotics variable dichotomized at the mean as the dependent variable. Test of association by type of independent variables: categorical: chi-square test; continuous: t test.

<sup>b</sup>Immunosuppressive therapies and antibiotics are listed in Table 1.

| eTable 2. Univariate Association of Selected Characteristics With Combined Outcome of SSh or 30-Day Cumulative Mortality |                                    |                                |                   |                      |
|--------------------------------------------------------------------------------------------------------------------------|------------------------------------|--------------------------------|-------------------|----------------------|
| Characteristic                                                                                                           | No SSh or 30-Day Mortality (n=132) | SSh or 30-Day Mortality (n=30) | Total (Missing=0) | P Value <sup>a</sup> |
| <b>Demographics</b>                                                                                                      |                                    |                                |                   |                      |
| Age, mean (SD), y                                                                                                        | 50.7 (14.9)                        | 52.0 (16.7)                    | 51.0 (15.2)       | .668                 |
| Sex                                                                                                                      |                                    |                                |                   | .875                 |
| Female                                                                                                                   | 46 (82.1%)                         | 10 (17.9%)                     | 56 (34.6%)        |                      |
| Male                                                                                                                     | 86 (81.1%)                         | 20 (18.9%)                     | 106 (65.4%)       |                      |
| Race                                                                                                                     |                                    |                                |                   | .071                 |
| Caucasian                                                                                                                | 107 (84.3%)                        | 20 (15.8%)                     | 127 (83.0%)       |                      |
| Other                                                                                                                    | 18 (69.2%)                         | 8 (30.8%)                      | 26 (17.0%)        |                      |
| <b>Baseline clinical characteristics</b>                                                                                 |                                    |                                |                   |                      |
| Oncologic diagnosis                                                                                                      |                                    |                                |                   | .061                 |
| Heme malignancy                                                                                                          | 118 (83.7%)                        | 23 (16.3%)                     | 141 (87.0%)       |                      |
| Other                                                                                                                    | 14 (66.7%)                         | 7 (33.3%)                      | 21 (13.0%)        |                      |
| HSCT status                                                                                                              |                                    |                                |                   | .187                 |
| Allo or auto                                                                                                             | 66 (85.7%)                         | 11 (14.3%)                     | 77 (47.5%)        |                      |
| None                                                                                                                     | 66 (77.7%)                         | 19 (22.4%)                     | 85 (52.5%)        |                      |
| Immunosuppressives <sup>b</sup>                                                                                          |                                    |                                |                   | .547                 |
| Any                                                                                                                      | 38 (84.4%)                         | 7 (15.6%)                      | 45 (27.8%)        |                      |
| None                                                                                                                     | 94 (80.3%)                         | 23 (19.7%)                     | 117 (72.2%)       |                      |
| Neutropenia                                                                                                              |                                    |                                |                   | .742                 |
| ANC <500 cells/mcL                                                                                                       | 66 (82.5%)                         | 14 (17.5%)                     | 80 (49.4%)        |                      |
| ANC ≥500 cells/mcL                                                                                                       | 66 (80.5%)                         | 16 (19.5%)                     | 82 (50.6%)        |                      |
| Antibiotics <sup>b</sup>                                                                                                 |                                    |                                |                   | .613                 |
| Any                                                                                                                      | 86 (80.4%)                         | 21 (19.6%)                     | 107 (66.1%)       |                      |
| None                                                                                                                     | 46 (83.6%)                         | 9 (16.4%)                      | 55 (34.0%)        |                      |
| <b>Clinical characteristics/concurrent therapies (current sepsis episode)</b>                                            |                                    |                                |                   |                      |
| Bacteremia                                                                                                               |                                    |                                |                   | .952                 |
| Yes                                                                                                                      | 58 (81.7%)                         | 13 (18.3%)                     | 71 (43.8%)        |                      |
| No                                                                                                                       | 74 (81.3%)                         | 17 (18.7%)                     | 91 (56.2%)        |                      |
| Dexamethasone                                                                                                            |                                    |                                |                   | .489                 |
| Yes                                                                                                                      | 62 (83.8%)                         | 12 (16.2%)                     | 74 (45.7%)        |                      |
| No                                                                                                                       | 70 (79.6%)                         | 18 (20.5%)                     | 88 (54.3%)        |                      |

Abbreviations: ABx, antibiotics; allo, allogeneic; ANC, absolute neutrophil count; auto, autologous; heme, hematopoietic; HSCT, hematopoietic stem cell transplant; SS, severe sepsis; SSh, septic shock.

<sup>a</sup>P value calculated using test of association by type of independent variables: categorical: chi-square test; continuous: t test.

<sup>b</sup>Immunosuppressive therapies and antibiotics are listed in Table 1.

| eTable 3. Processes of Care Delivery: Clinic Time Flow in Recipients of the Sepsis STAT Pack |                     |                 |              |
|----------------------------------------------------------------------------------------------|---------------------|-----------------|--------------|
| Time Elapsed                                                                                 | n<br>(% Nonmissing) | Median<br>(min) | IQR<br>(min) |
| Time from first encounter to clinical encounter                                              | 162 (100)           | 26              | 0–70         |
| Time from clinical encounter to antibiotics dispensed                                        | 162 (100)           | 74              | 31–123       |
| Time from antibiotics dispensed to antibiotics administered                                  | 160 (98.8)          | 26              | 19–46        |
| Time from antibiotics administered to inpatient admission                                    | 153 (94.4)          | 84              | 61–122       |
| Time from clinical encounter to antibiotics administered                                     | 160 (98.8)          | 111             | 60–178       |
| Time from blood culture to antibiotics administered                                          | 160 (98.8)          | 40              | 15–81        |
| Time from first encounter to inpatient admission                                             | 155 (95.7)          | 260             | 188–385      |

Abbreviation: IQR, interquartile range.

| eTable 4. Metrics of Sepsis Disease Severity for Sepsis STAT Pack Cohort |                   |                                                                                        |                               |                                                          |
|--------------------------------------------------------------------------|-------------------|----------------------------------------------------------------------------------------|-------------------------------|----------------------------------------------------------|
| Disease Category                                                         | Patients<br>n (%) | Number Organ Systems<br>With Dysfunction:<br>Number of<br>Patients (%) <sup>a</sup>    | APACHE II Score,<br>Mean (SD) | Volume Intravenous Fluid<br>Administration,<br>Mean (SD) |
| No SIRS                                                                  | 13 (8.0)          | 0: 11 (84.6)<br>1: 2 (15.4)                                                            | 14.6 (4.7)                    | 6-hr: 1.5 (1.1)<br>24-hr: 3.0 (1.9)                      |
| SIRS only                                                                | 6 (3.7)           | 0: 3 (50.0)<br>1: 3 (50.0)                                                             | 15.2 (4.7)                    | 6-hr: 1.0 (0.5)<br>24-hr: 2.8 (2.1)                      |
| Sepsis                                                                   | 71 (43.8)         | 0: 49 (68.1)<br>1: 23 (31.9)                                                           | 16.4 (4.1)                    | 6-hr: 1.3 (0.8)<br>24-hr: 2.7 (1.4)                      |
| Severe sepsis                                                            | 47 (29.0)         | 0: 0 (0)<br>1: 28 (60.9)<br>2: 16 (34.8)<br>3: 1 (2.2)<br>4: 1 (2.2)                   | 17.1 (4.2)                    | 6-hr: 1.4 (0.9)<br>24-hr: 3.4 (1.6)                      |
| Septic shock                                                             | 25 (15.4)         | 0: 0 (0)<br>1: 12 (48.0)<br>2: 4 (16.0)<br>3: 6 (24.0)<br>5: 3 (12.0)                  | 23.0 (8.0)                    | 6-hr: 3.3 (2.0)<br>24-hr: 6.1 (2.5)                      |
| Total                                                                    | 162 (100)         | 0: 63 (38.9)<br>1: 68 (42.0)<br>2: 20 (12.4)<br>3: 7 (4.3)<br>4: 1 (0.6)<br>5: 3 (1.9) | 17.5 (5.5)                    | 6-hr: 1.7 (1.3)<br>24-hr: 3.5 (2.1)                      |

Abbreviation: SIRS, systemic inflammatory response syndrome.

<sup>a</sup>Percentages are across row.



eTable 5. Clinically or Microbiologically Diagnosed Infections and Alternative Diagnoses

| Disease Category | Patients, n (%) | Diagnosis <sup>a</sup> | Other Infections and Alternative Diagnoses |                                                                                                                                                                                |
|------------------|-----------------|------------------------|--------------------------------------------|--------------------------------------------------------------------------------------------------------------------------------------------------------------------------------|
| No SIRS          | 13 (8.0)        | Bacteremia             | 6                                          |                                                                                                                                                                                |
|                  |                 | Other infection        | 3                                          | Hepatic abscess (1), UTI (1) wound infection (1)                                                                                                                               |
|                  |                 | Suspected infection    | 3                                          |                                                                                                                                                                                |
|                  |                 | Alternative diagnosis  | 1                                          | Drug reaction (1)                                                                                                                                                              |
| SIRS only        | 6 (3.7)         | Alternative diagnosis  | 6                                          | Drug reaction (2), tumor fever (2), dehydration (1), pancreatitis (1)                                                                                                          |
| Sepsis           | 72 (43.8)       | Bacteremia             | 24                                         |                                                                                                                                                                                |
|                  |                 | Other infection        | 19                                         | PNA (4), fungal PNA (3), viral PNA (6), C. diff (2), diverticulitis (1), peritonitis (1), UTI (1), meningitis (1)                                                              |
|                  |                 | Cx-neg sepsis          | 29                                         |                                                                                                                                                                                |
| Severe sepsis    | 46 (29.0)       | Bacteremia             | 29                                         |                                                                                                                                                                                |
|                  |                 | Other infection        | 4                                          | PNA (1), fungal PNA (1), CMV enteritis (1), UTI (1)                                                                                                                            |
|                  |                 | Cx-neg sepsis          | 13                                         |                                                                                                                                                                                |
| Septic shock     | 25 (15.4)       | Bacteremia             | 12                                         |                                                                                                                                                                                |
|                  |                 | Other infection        | 7                                          | PNA (3), viral PNA (2), CMV enteritis (1), UTI (1)                                                                                                                             |
|                  |                 | Cx-neg sepsis          | 6                                          |                                                                                                                                                                                |
| Total            | 162 (100)       | Bacteremia             | 71                                         |                                                                                                                                                                                |
|                  |                 | Other infection:       | 33                                         | PNA (8), fungal PNA (4), viral PNA (8), UTI (4), CMV enteritis (2), C. diff (2), diverticulitis (1), peritonitis (1), hepatic abscess (1), meningitis (1), wound infection (1) |
|                  |                 | Cx-neg sepsis          | 48                                         |                                                                                                                                                                                |
|                  |                 | Suspected infection    | 3                                          |                                                                                                                                                                                |
|                  |                 | Alternative diagnosis  | 7                                          | Drug reaction (3), tumor fever (2), dehydration (1), pancreatitis (1)                                                                                                          |

Abbreviations: C. diff, Clostridium difficile; CMV, cytomegalovirus; Cx-neg, culture negative; PNA, pneumonia; SIRS, systemic inflammatory response syndrome; UTI, urinary tract infection.

<sup>a</sup>Cx-neg sepsis: criteria for sepsis (or more severe sepsis) are met, but no alternative diagnosis or clinical/microbiological diagnosed infection is evident.

eTable 6. Unique Bacterial Bloodstream Isolates, Drug Susceptibility, and Intrinsic Resistance

| Name                                         | N  | Drug Resistance Classification <sup>a</sup> | Antibiotic-Resistant Classes or Mechanism <sup>b</sup>                                                              |
|----------------------------------------------|----|---------------------------------------------|---------------------------------------------------------------------------------------------------------------------|
| Gram-negative bacteria                       |    |                                             |                                                                                                                     |
| <i>Achromobacter xylosoxidans</i>            | 1  | 1 MDR                                       | AG+MB+CHL                                                                                                           |
| <i>Acinetobacter baumannii</i>               | 2  | 1 DR                                        | ampC                                                                                                                |
| <i>Acinetobacter junii</i>                   | 1  |                                             |                                                                                                                     |
| <i>Acinetobacter ursingii</i>                | 8  | 3 DR                                        | 3-ceph (2),<br>3-ceph+AG (1)                                                                                        |
| <i>Aeromonas caviae</i>                      | 1  |                                             |                                                                                                                     |
| <i>Citrobacter freundii</i>                  | 1  | 1 DR                                        | 3-ceph+MB                                                                                                           |
| <i>Delftia acidovorans</i>                   | 1  | 1 DR                                        | 4-ceph, PMX                                                                                                         |
| <i>Enterobacter aerogenes</i>                | 1  |                                             |                                                                                                                     |
| <i>Enterobacter asburiae</i>                 | 1  |                                             |                                                                                                                     |
| <i>Enterobacter cloacae</i>                  | 9  | 3 MDR, 1 MDR/XDR                            | ampC (3),<br>ampC+AG+FQ (1)                                                                                         |
| <i>Escherichia coli</i>                      | 8  | 1 DR, 3 MDR,<br>2 MDR/XDR                   | aPCN+FQ (1),<br>aPCN/βLI+AG+FQ (2),<br>aPCN+esPCN/βLI+AG+FQ (1),<br>ESβL+FQ (1),<br>aPCN/βLI+1,3-ceph+AG+FQ+FSI (1) |
| <i>Klebsiella oxytoca</i>                    | 4  |                                             |                                                                                                                     |
| <i>Klebsiella pneumoniae</i>                 | 4  | 1 DR, 1 MDR/XDR                             | FQ (1),<br>ampC+AG+FQ (1)                                                                                           |
| <i>Leptotrichia</i> spp                      | 1  |                                             |                                                                                                                     |
| <i>Pantoea</i> spp                           | 3  | 2 DR                                        | aPCN (1),<br>aPCN+1-ceph (1)                                                                                        |
| <i>Proteus mirabilis</i>                     | 1  |                                             |                                                                                                                     |
| <i>Pseudomonas aeruginosa</i>                | 9  | 4 DR, 1 MDR                                 | FQ (1),<br>esPCN/βLI (1),<br>MB+esPCN/βLI (1),<br>Carba (1),<br>ESβL (1)                                            |
| <i>Rhizobium radiobacter</i>                 | 1  | 1 MDR                                       | MB+3-ceph+AG+CHL                                                                                                    |
| <i>Serratia marcescens</i>                   | 3  |                                             |                                                                                                                     |
| <i>Stenotrophomonas maltophilia</i>          | 3  | 2 DR                                        | esPCN/βLI (2)                                                                                                       |
| Gram-positive bacteria                       |    |                                             |                                                                                                                     |
| <i>Clostridium perfringens</i>               | 1  |                                             |                                                                                                                     |
| <i>Enterococcus faecalis</i>                 | 2  | 1 DR                                        | Tetra                                                                                                               |
| <i>Enterococcus faecium</i>                  | 2  | 1 DR/MDR, 1 MDR                             | VRE (1),<br>VRE+Tetra (1)                                                                                           |
| <i>Rothia mucilaginosa</i>                   | 4  | 1 DR                                        | AG+FQ                                                                                                               |
| <i>Staphylococcus aureus</i>                 | 2  | 1 MDR                                       | MRSA+LCS                                                                                                            |
| <i>Staphylococcus</i> , CoNS                 | 13 | 2 MDR                                       | MR-CoNS+LCS+FSI (2)                                                                                                 |
| <i>Streptococcus agalactiae</i>              | 1  |                                             |                                                                                                                     |
| <i>Streptococcus bovis</i>                   | 1  |                                             |                                                                                                                     |
| <i>Streptococcus viridans</i>                | 3  | 1 DR                                        | FQ                                                                                                                  |
| Gram-positive cocci, not otherwise specified | 1  |                                             |                                                                                                                     |
| Unique isolates                              | 93 | 37                                          | Drug-resistant isolates                                                                                             |

Abbreviations: 1,3-ceph, first- and third-generation cephalosporin; AG, aminoglycosides; ampC, AmpC β-lactamase; aPCN, amino-penicillin; βLI, β-lactamase inhibitor; Carba, carbapenem; cep, cephalosporin, CHL, chloramphenicol; CoNS, coagulase-negative staphylococci; DR, drug-resistant; ECDC, European Centre for Disease Prevention and Control; ESβL, extended-spectrum β-lactamase; esPCN, extended-spectrum penicillin; EUCAST, European Committee on Antimicrobial Susceptibility Testing; FSI, folate synthesis inhibitor; FQ, fluoroquinolone; LCS, lincosamide; MB, monobactam; MDR, multidrug-resistant; MR, methicillin-resistant; MRSA, methicillin-resistant *Staphylococcus aureus*; PMX, polymyxin; Tetra, tetracycline; VRE, vancomycin-resistant enterococcus; XDR, extensively drug-resistant.

<sup>a</sup>Drug resistance definitions are determined from the EUCAST expert rules on antimicrobial susceptibility testing<sup>1</sup> and/or the ECDC consensus on drug resistance,<sup>2</sup> and do not include antimicrobials to which the isolate is intrinsically resistant. Bridge categories of DR/MDR refers to possible MDR isolate, MDR/XDR refers to possible XDR isolate but without enough drug classes tested as per ECDC consensus on drug resistance.<sup>2</sup>

<sup>b</sup>The antimicrobial resistance mechanism is inferred from the agar disc diffusion antimicrobial susceptibility pattern.

Sources: <sup>1</sup>Leclercq R, Cantón R, Brown DF, et al. EUCAST expert rules in antimicrobial susceptibility testing. Clin Microbiol Infect 2013;19:141–160; <sup>2</sup>Magiorakos AP, Srinivasan A, Carey RB, et al. Multidrug-resistant, extensively drug-resistant and pandrug-resistant bacteria: an international expert proposal for interim standard definitions for acquired resistance. Clin Microbiol Infect 2012;18:268–281.

eTable 7. Benchmark Mortality Data: Mortality Data for Patients With Cancer and Severe Sepsis/Septic Shock

| Study                        | 1) Setting<br>2) Population (identification)<br>3) Study design                                                                                                                                                                       | Deceased/Total, N<br>% (95% CI)                                                                                                                                        |
|------------------------------|---------------------------------------------------------------------------------------------------------------------------------------------------------------------------------------------------------------------------------------|------------------------------------------------------------------------------------------------------------------------------------------------------------------------|
| Williams, et al <sup>1</sup> | 1) Hospitalized patients in 6 US states, 1999<br>2) Patients with cancer with SS/SSh, hospitalized (administrative data)<br>3) Retrospective cohort                                                                                   | Hospital mortality, SS/SSh<br>Unknown/29,795<br>37.8% (cannot estimate) <sup>a</sup>                                                                                   |
| Larche et al <sup>2</sup>    | 1) Single-center ICU in Paris, France (St Louis), 1995–2000<br>2) Patients with cancer with SSh, ICU (clinical records)<br>3) Retrospective cohort                                                                                    | 30-day mortality SSh<br>57/88<br>65.5% (54%–75%)                                                                                                                       |
| Legrand et al <sup>3</sup>   | 1) Single-center academic ICU in Paris, France (St Louis), 1998–2008<br>2) Neutropenic patients with cancer with SS/SSh, ICU (uncertain)<br>3) Retrospective cohort                                                                   | Hospital mortality, SS/SSh<br>213/428<br>49.8% (45%–55%)                                                                                                               |
| Pène et al <sup>4</sup>      | 1) Single-center ICU in Paris, France (Cochin), 1998–2005<br>2) Patients with cancer with SSh, ICU (uncertain)<br>3) Retrospective cohort                                                                                             | 28-day mortality SSh<br>143/238<br>60.1% (54%–66%)<br>ICU mortality, SSh<br>153/238<br>64.3% (58%–70%)<br>Hospital mortality SSh<br>165/238<br>69.3% (63%–75%)         |
| Mokart et al <sup>5</sup>    | 1) Single-center ICU in Marseille, France, 2008–2010<br>2) Neutropenic patients with cancer with SS or SSh, ICU (sequential patients enrolled)<br>3) Prospective cohort                                                               | ICU mortality SS/SSh<br>40/118<br>33.9% (25%–43%)                                                                                                                      |
| Azoulay et al <sup>6</sup>   | 1) Multicenter network of 17 academic ICUs in France and Belgium, 2010–2011<br>2) Hematologic malignancy patients with SS/SSh, ICU (sequential patients enrolled)<br>3) Prospective cohort, primary analysis                          | Hospital mortality SS<br>120/349<br>34.4% (29%–40%)<br>Hospital mortality SSh<br>120/259<br>46.3% (40%–53%)<br>Hospital mortality SS/SSh<br>240/608<br>39.5% (36%–43%) |
| Mokart et al <sup>7</sup>    | 1) Multicenter network of 17 academic ICUs in France and Belgium, 2010–2012<br>2) Neutropenic hematologic malignancy patients with sepsis, SS, or SSh, ICU (sequential patients enrolled)<br>3) Prospective cohort, post hoc analysis | Hospital mortality, sepsis/SS/SSh<br>104/230<br>45.2% (39%–52%)                                                                                                        |

Abbreviations: ICU, intensive care unit; SS, severe sepsis; SSh, septic shock.

<sup>a</sup>Count data not provided, so cannot accurately estimate 95% CI.

Sources: <sup>1</sup>Williams MD, Braun LA, Cooper LM, et al. Hospitalized cancer patients with severe sepsis: analysis of incidence, mortality, and associated costs of care. *Crit Care* 2004;8:R291–298; <sup>2</sup>Larche J, Azoulay E, Fieux F, et al. Improved survival of critically ill cancer patients with septic shock. *Intensive Care Med* 2003;29:1688–1695; <sup>3</sup>Legrand M, Max A, Peigne V, et al. Survival in neutropenic patients with severe sepsis or septic shock. *Crit Care Med* 2012;40:43–49; <sup>4</sup>Pène F, Percheron S, Lemiale V, et al. Temporal changes in management and outcome of septic shock in patients with malignancies in the intensive care unit. *Crit Care Med* 2008;36:690–696; <sup>5</sup>Mokart D, Saillard C, Sannini A, et al. Neutropenic cancer patients with severe sepsis: need for antibiotics in the first hour. *Intensive Care Med* 2014;40:1173–1174; <sup>6</sup>Azoulay E, Mokart D, Pène F, et al. Outcomes of critically ill patients with hematologic malignancies: prospective multicenter data from France and Belgium—a groupe de recherche respiratoire en réanimation onco-hématologique study. *J Clin Oncol* 2013;31:2810–2818; <sup>7</sup>Mokart D, Darmon M, Resche-Rigon M, et al. Prognosis of neutropenic patients admitted to the intensive care unit. *Intensive Care Med* 2015;41:296–303.

## eAppendix 1. Methods

### Sepsis Definitions

#### Surviving Sepsis Campaign Guidelines<sup>1</sup>

##### **Systemic Inflammatory Response Syndrome Criteria (≥2 of following)**

- Body temperature >38.3°C or <36.0°C
- Heart rate >90 beats per minute (bpm)
- Respiratory rate >20/minute or partial pressure of carbon dioxide, arterial (Paco<sub>2</sub>) <32 mmHg (4.3 kPa)
- WBC count >12,000/mcL or <4,000/mcL or immature granulocytes >10%
- Altered mental status (Glasgow Coma Scale [GCS] <15 or objective assessment by clinician)

Note: Vital sign and laboratory abnormalities were assessed 24 hours before and after dispensing of the Sepsis STAT Pack antibiotics. Due to frequency of abnormalities to WBC counts in patients with cancer, systemic inflammatory response syndrome (SIRS) criteria for leukocytosis, leukopenia, or bandemia were considered fulfilled only if unequivocally due to the infection defining the septic episode by change from normal on most recent laboratory results and absence of other condition or treatment that could cause the abnormality in WBC count, including but not limited to cytotoxic or conditioning chemotherapy, irradiation, steroids, granulocyte colony-stimulating factor, calcineurin inhibitor, trimethoprim-sulfamethoxazole, or ganciclovir.

##### **Sepsis Criteria (meeting SIRS criteria and ≥1 of following)**

- Microbiologically confirmed infection
- Clinically diagnosed infection
- Suspected infection

Note: Patients were considered to have microbiologically confirmed infection if microbiologic cultures revealed an etiology consistent with the clinical syndrome. Patients were considered to have suspected infection based on the assessment of the treating clinicians or by non-microbiologic diagnostic testing, and absence of alternative diagnosis. Because clinical decisions in the outpatient setting were made in real-time and therapies were administered before all information is available to the treating clinician, we assumed that the initial treating clinicians made the correct assessment of suspected infection, unless later disproven by better alternative diagnosis. If better alternative diagnosis was made in hindsight (eg, drug allergy, infusion reaction), these cases were classified

as SIRS only/alternative diagnosis. Culture-negative sepsis occurred when no clinically or microbiologically diagnosed infection or alternative diagnosis presented but when the initial treating clinician suspected sepsis.

##### **Severe Sepsis Criteria (meeting Sepsis Criteria and ≥1 of the following definitions for organ dysfunction or decreased tissue perfusion)**

- Arterial hypotension (systolic blood pressure [SBP] <90 mmHg or mean arterial pressure [MAP] <70 mmHg)
- Arterial hypoxemia (partial pressure of oxygen, arterial/fraction of inspired oxygen [Pao<sub>2</sub>/Fio<sub>2</sub>] <300)
- Acute oliguria (urine output <0.5 mL/kg/h for ≥2 hours despite adequate intravenous fluids)
- Acute kidney injury (AKI) (creatinine increase >0.5 mg/dL)
- Coagulation abnormalities (international normalized ratio [INR] >1.5, activated partial thromboplastin time [aPTT] >60 s or platelets <100,000/mcL)
- Ileus (absent bowel sounds on clinical examination or otherwise unexplained emesis temporally related to hypotension)
- Hyperbilirubinemia (plasma total bilirubin >4 mg/dL)
- Hyperlactatemia (arterial lactate ≥1 mmol/L or venous lactate ≥4 mmol/L)
- Decreased capillary refill or skin mottling on clinical examination

Note: Patients were considered to have arterial hypotension only if the SBP or MAP criteria were fulfilled by repeated readings to exclude spurious measurements. Further, sepsis-related arterial hypotension was determined only if the hypotension was temporally related to the sepsis episode: patients with alternative explanations for hypotension (ie, low baseline blood pressure, hypotension only while sleeping) did not meet criteria for severe sepsis. Because few patients had arterial blood gas measurement, additional criteria for hypoxemia was determined by peripheral capillary oxygen saturation (Spo<sub>2</sub>) <90% with acute change from baseline. Evidence of other organ system dysfunction or poor tissue perfusion was determined to be sepsis-induced and fulfilled criteria for severe sepsis only if unequivocally due to the infection defining the septic episode by change from nor-

mal on most recent laboratory results and absence of other condition or treatment that could cause the abnormality. Specifically, thrombocytopenia was excluded as a cause of sepsis-related organ dysfunction due to the very high frequency of baseline thrombocytopenia in this population. Coagulation abnormality was considered fulfilled only if not explained by underlying disease or treatment with heparin, warfarin, or other anticoagulant. Ileus was considered strictly as clinician-diagnosed with or without supportive radiographic evidence; emesis alone did not fulfill this criteria, because patients undergoing treatments for malignancy have high frequency of treatment-related nausea and emesis. Sepsis-related ileus or skin changes were considered as evidence of organ dysfunction, but alone did not establish criteria for severe sepsis.

#### **Septic Shock Criteria (meeting Severe Sepsis Criteria and $\geq 1$ of the following)**

- Refractory hypotension
- Vasopressor agents used to support blood pressure

Note: Refractory hypotension defined as sepsis-induced hypotension persisting despite adequate fluid resuscitation ( $\geq 20$  mL/kg crystalloid infusion<sup>2,3</sup>). Vasopressors considered included norepinephrine, epinephrine, vasopressin, dopamine, dobutamine, or phenylephrine.

#### **APACHE II Score<sup>4</sup>**

The following variables from a 48-hour window centered on the dispensing of the Sepsis STAT Pack antibiotics were extracted from the University of Washington Clinical Data Warehouse (Amalga). The highest and lowest values were assigned points, and the highest points for each variable were totaled for the Acute Physiology Score (APS) as per the initial report.<sup>4</sup>

- Body temperature (oC)
- Mean arterial pressure (mmHg)
- Heart rate (bpm)
- Respiratory rate (breaths/min)
- Oxygenation: alveolar-arterial oxygen gradient (AaDo<sub>2</sub>) if Fio<sub>2</sub> >0.5 or Pao<sub>2</sub> if Fio<sub>2</sub> <0.5 (mmHg)
- Arterial pH, or serum HCO<sub>3</sub>-negative (mmol/L) if no arterial blood gas measurement
- Serum sodium (mmol/L)
- Serum potassium (mmol/L)
- Serum creatinine (mg/dL)

- Hematocrit (%)
- WBC count (x1,000 cells/mcL)
- GCS (points)

Note: Points for serum creatinine were doubled for AKI as per the initial APACHE II report,<sup>4,5</sup> with AKI defined as an increase in serum creatinine to >2.0 mg/dL from <1.4 mg/dL or elevated serum creatinine to >2.0 mg/dL that returns to <1.4 mg/dL. The total APACHE II score is the sum of APS + age points + 5 points for chronic organ insufficiency. Points for organ insufficiency based on immunosuppression were assigned if the patient had leukemia, lymphoma, neutropenia, or any immunosuppressive therapy (as listed in Table 1).

#### **List of Variables (and Source) of Raw Data**

- Demographics:
  - ◆ Date of birth (Amalga)
  - ◆ Sex (Amalga)
  - ◆ Race (Amalga)
- Administrative, time flow, and vital statistics:
  - ◆ Hospital admission and discharge date and time (Amalga)
  - ◆ Time and location of first encounter (electronic medical record [EMR])
  - ◆ Time and location of first clinical encounter (EMR)
  - ◆ Time of first laboratory and blood culture draw (EMR)
  - ◆ Time of antibiotic dispensing by pharmacy (PharmNet)
  - ◆ Time of antibiotic administration by nurse (EMR)
  - ◆ Date of death (Washington State Department of Health [WA DOH], Amalga, and hematopoietic stem cell transplant [HSCT])
  - ◆ Date of last UW Medicine encounter (Amalga)
- Clinical characteristics:
  - ◆ Oncologic diagnosis (HSCT or EMR)
  - ◆ Date of HSCT (HSCT)
  - ◆ Type of HSCT (HSCT)
  - ◆ Clinical diagnosis of ileus (EMR)
  - ◆ Clinical diagnosis of poor skin perfusion (EMR)
  - ◆ Clinical diagnosis of altered mental status (EMR)
  - ◆ Prophylactic antibiotics (EMR)
  - ◆ Immunosuppressive therapies (EMR)

- ◆ Adverse events (EMR)
- ◆ Intubation (Amalga and EMR)
- ◆ Microbiological data (EMR)
- ◆ Clinically diagnosed infection (EMR)
- ◆ Infectious disease consultation (EMR)
- ◆ Volume of intravenous crystalloid infusion in 6 and 24 hours (EMR)
- ◆ Urine output (EMR)
- ◆ Receipt of Seattle Cancer Care Alliance (SCCA) clinic antibiotics (EMR)
- ◆ Receipt of UW Medical Center hospital antibiotics (EMR)
- ◆ Receipt of dexamethasone in SCCA (PharmNet)
- ◆ Receipt of vasopressors (Amalga and EMR)
- ◆ Receipt of anticoagulants (EMR)
- Vital signs and laboratory data:
  - ◆ All APACHE II variables for APS as above (Amalga)
  - ◆ Clinician note documented vital sign data (EMR)
  - ◆ Weight (EMR)
  - ◆ SpO<sub>2</sub> and FiO<sub>2</sub> (EMR)
  - ◆ Absolute neutrophil count (EMR)
  - ◆ Immature granulocyte (EMR)
  - ◆ INR, aPTT (EMR)
  - ◆ Serum bilirubin (Amalga)
  - ◆ Arterial or venous lactate (EMR)

Note: Data sources: Amalga: UW Medicine clinical data repository; HSCT: Fred Hutchinson Cancer

Research Center (FHCRC) Infectious Disease HSCT database; PharmNet: UW Medicine pharmacy informatics system; EMR: Citrix EMR; WA DOH: Washington Department of Health death data.

## Data Collection and Assignment of Sepsis Disease Severity

Data were extracted from electronic data sources at FHCRC and UW Medicine, and variables identified above by “EMR” were abstracted by manual chart review by 2 reviewers (J.D.G., A.G.). Mortality was ascertained from 2 independent sources: WA DOH death certificate data and the UW Medicine clinical data repository. Assessments of sepsis disease severity criteria were determined through manual chart review by 1 reviewer. Logic definitions to distinguish syndromes were then applied to abstracted raw data to check the reviewer assessments with objective criteria of the Surviving Sepsis Campaign guidelines.<sup>1</sup> If discordance was present, charts were reexamined by the other reviewer to determine consensus. To determine adverse effects, the medical record was searched electronically for the following terms: “nephrotoxicity,” “ototoxicity,” “rash,” and “serotonin syndrome,” and hits to these search terms triggered review of relevant clinical notes. All cases of AKI were reviewed to determine temporal association to tobramycin administration.

## References

1. Dellinger RP, Levy MM, Rhodes A, et al. Surviving sepsis campaign: international guidelines for management of severe sepsis and septic shock: 2012. *Crit Care Med* 2013;41:580–637.
2. Rivers E, Nguyen B, Havstad S, et al. Early goal-directed therapy in the treatment of severe sepsis and septic shock. *N Engl J Med* 2001;345:1368–1377.
3. Yealy DM, Kellum JA, Huang DT, et al. A randomized trial of protocol-based care for early septic shock. *N Engl J Med* 2014;370:1683–1693.
4. Knaus WA, Draper EA, Wagner DP, Zimmerman JE. APACHE II: a severity of disease classification system. *Crit Care Med* 1985;13:818–829.
5. Sweet SJ, Glenney CU, Fitzgibbons JP, et al. Synergistic effect of acute renal failure and respiratory failure in the surgical intensive care unit. *Am J Surg* 1981;141:492–496.
